# Supplementary material for: On the origin of non-monotonic variation of the lattice parameters of LiNi1/3Co1/3Mn1/3O2 with lithiation/delithiation: a first-principles study
Source: Royal Society of Chemistry journal article supplement (doi:10.1039/d0ta02319a), 2020-01-01
Supplement: d0ta02319a1.pdf [file d0ta02319a1.pdf]

Supporting Information

for

**On the origin of non-monotonic variation of lattice parameters of  $\text{LiNi}_{1/3}\text{Co}_{1/3}\text{Mn}_{1/3}\text{O}_2$  with lithiation/delithiation: a first-principles study**

Liang-Yin Kuo,<sup>a,b</sup> Olivier Guillon,<sup>b</sup> and Payam Kaghazchi<sup>\*b</sup>

<sup>a</sup>Physikalische und Theoretische Chemie, Freie Universität Berlin, Arnimallee 22, D-14195 Berlin, Germany

<sup>b</sup>Forschungszentrum Jülich GmbH, Institute of Energy and Climate Research, Materials Synthesis and Processing (IEK-1), D-52425, Jülich, Germany

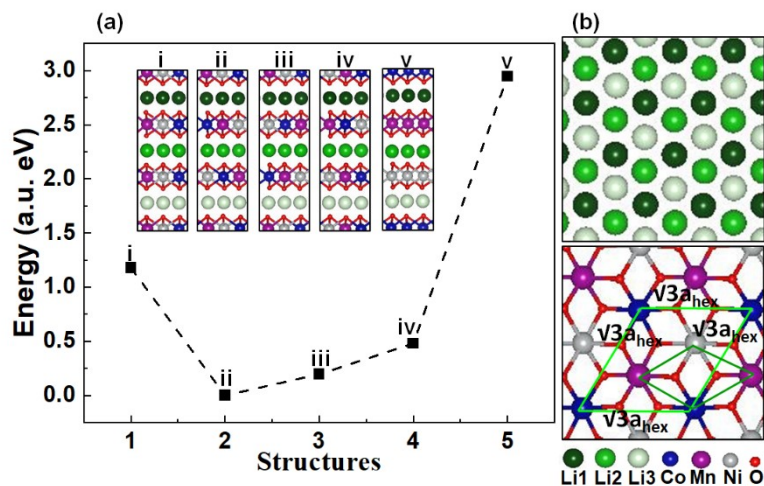

**Figure S1.** (a) Energy difference between NMC111 structures with various TM cations arrangements. (b) Top views of the Li and O-TM-O layers in the most favorable NMC111 structure (ii).

| $x$  | PBE  | PBE+ $U$ | SCAN | Exp. |
|------|------|----------|------|------|
| 1.00 | 48.1 | 86.0     | 58.5 | 60   |
| 0.67 | 43.9 | 83.9     | 46.5 | 48   |
| 0.50 | 21.4 | 73.8     | 41.0 | 42   |
| 0.33 | 36.0 | 61.2     | 35.6 | 36   |
| 0.17 | 24.0 | 70.9     | 33.5 | -    |

**Table S1.** Calculated total number of unpaired spins (NUS) for  $\text{Li}_x\text{NCM111}$  with  $x=1.00, 0.67, 0.50, 0.33,$  and  $0.17$  using different types of XC functionals. Expected NUS values (based on previous experimental and theoretical studies) for a perfect ionic system are also listed.

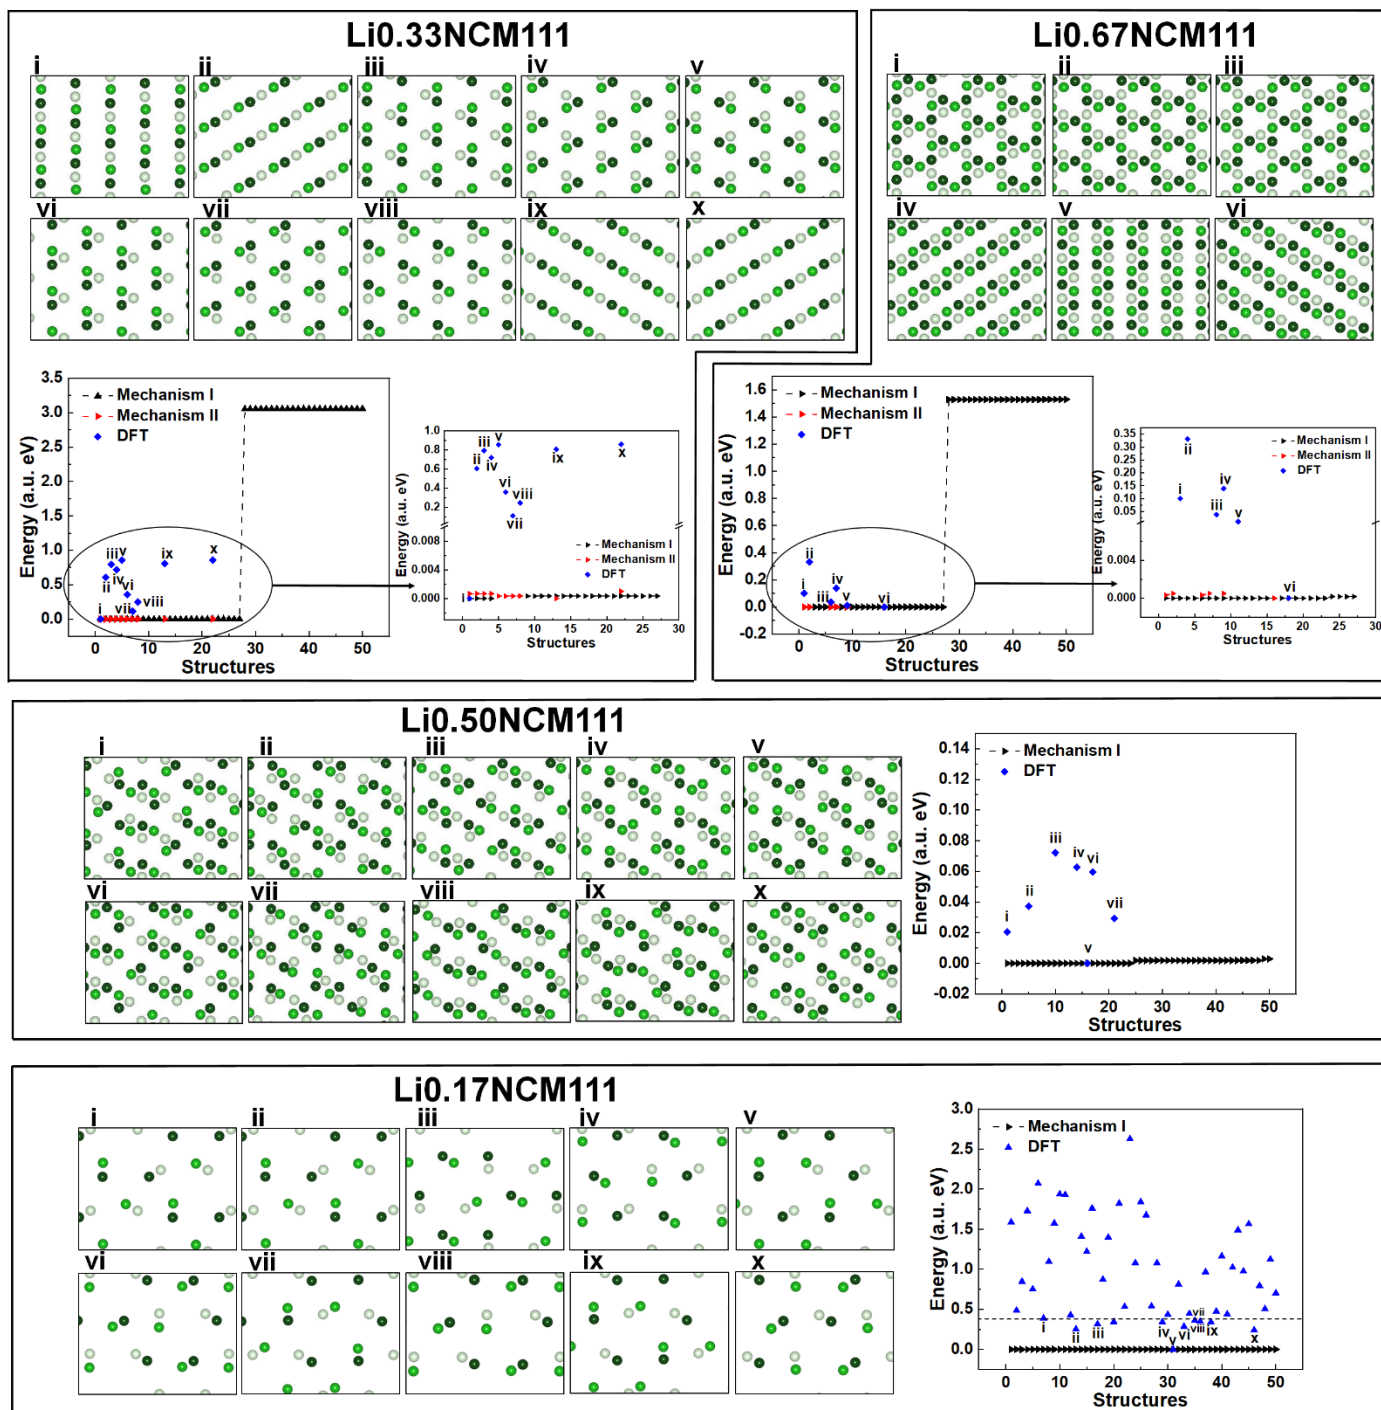

**Figure S2.** Calculated total Coulomb energies (referenced to the minimum energy) for  $\text{Li}_x\text{NCM111}$  ( $x = 0.67, 0.50, 0.33,$  and  $0.17$ ). Calculated DFT-PBE total energies of the most favorable structures based on the electrostatic analysis are also given. Arrangements of Li ions in several (DFT-PBE-calculated) lowest-energy structures are also presented.

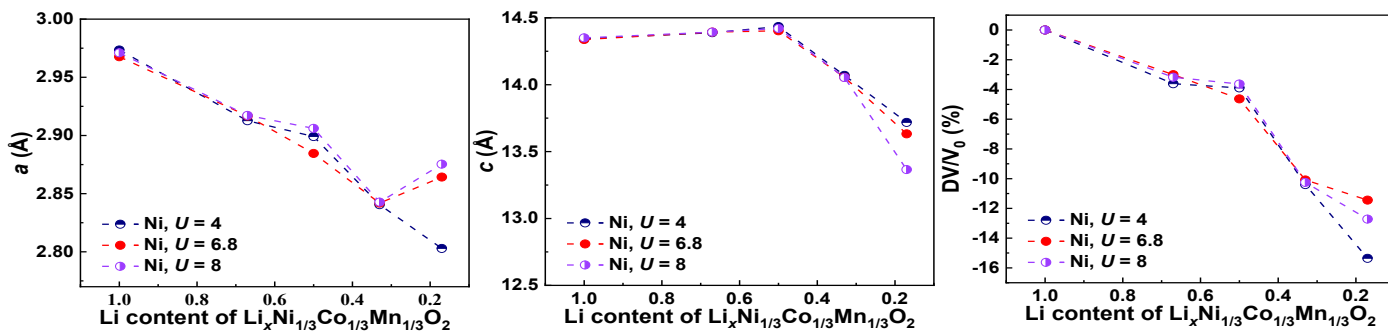

Figure S3. Calculated lattice parameters and volume change as function of  $x$  for  $\text{Li}_x\text{NCM111}$  using DFT-PBE+ $U$  with different  $U$  values for Ni.

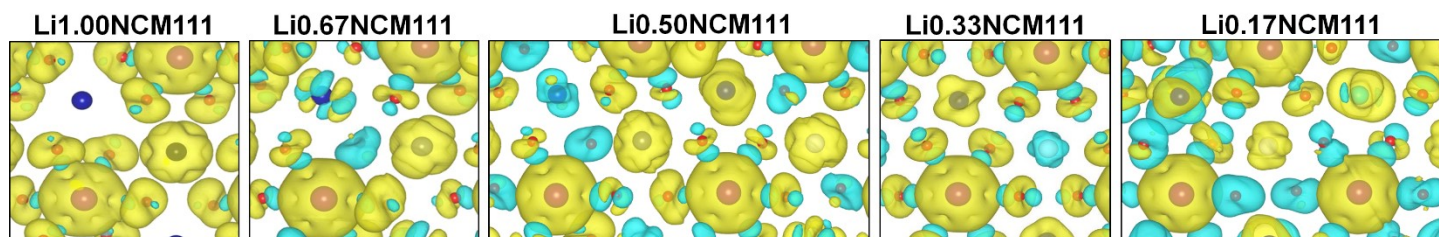

Figure S4. Calculated spin density difference (SDD) in the most favorable  $\text{Li}_x\text{NCM111}$  structures using the SCAN functional. Up-spin and down-spin electrons are in yellow and blue, respectively. An isosurface of 0.004 electrons/ $\text{\AA}^3$  was applied.

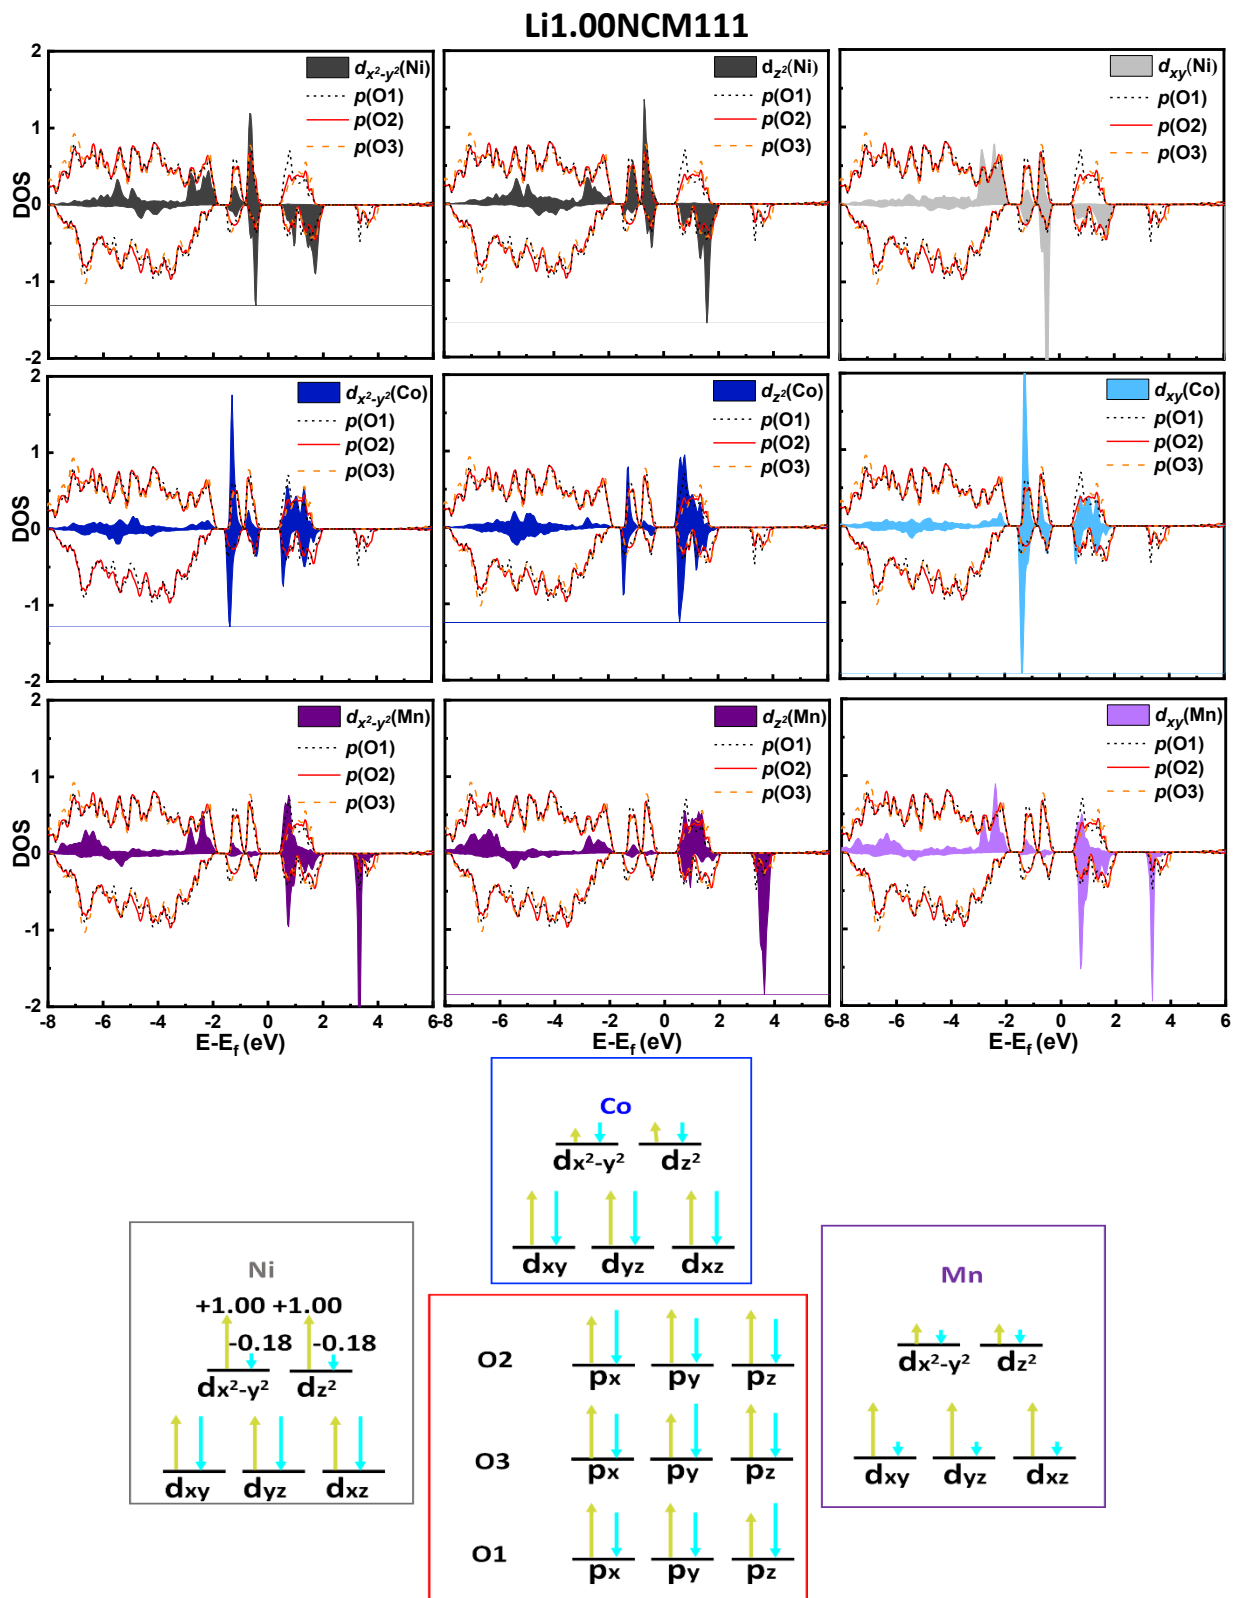

**Fig. S5.** Partial density of states (PDOSs) and proposed electronic configurations in the most favorable Li<sub>1.00</sub>NCM111 structures based on DFT-SCAN calculation. The atomic coordinates were rotated about the by-axis to align axial TM–O bonds (in TMO<sub>6</sub> octahedra) along the global z-axis of the unit cell to assign the  $e_g$  and representative  $t_{2g}$  states.

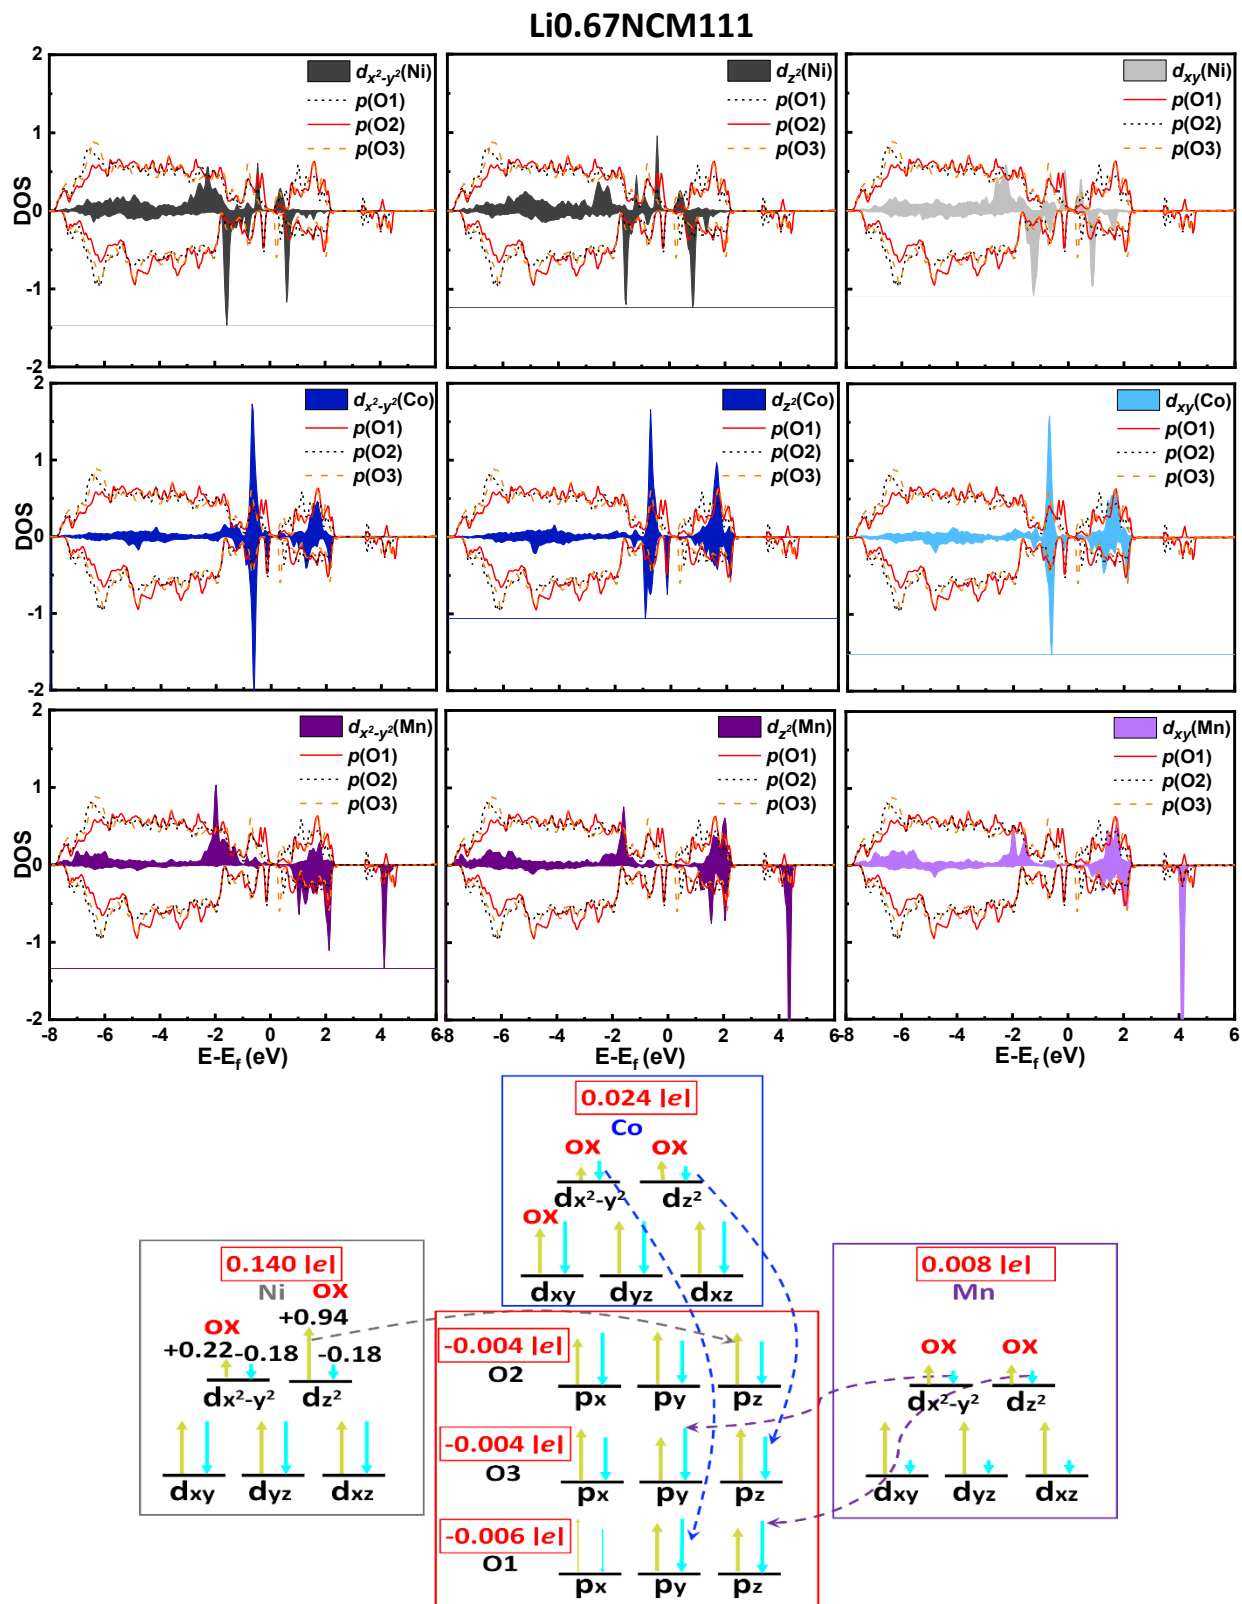

**Fig. S6.** Partial density of states (PDOSs) and proposed electronic configurations in the most favorable  $\text{Li}_{0.67}\text{NCM111}$  structures based on DFT-SCAN calculation. The atomic coordinates were rotated about the  $b_y$ -axis to align axial TM-O bonds (in  $\text{TMO}_6$  octahedra) along the global  $z$ -axis of the unit cell to assign the  $e_g$  and representative  $t_{2g}$  states.

### Li<sub>0.33</sub>NCM111

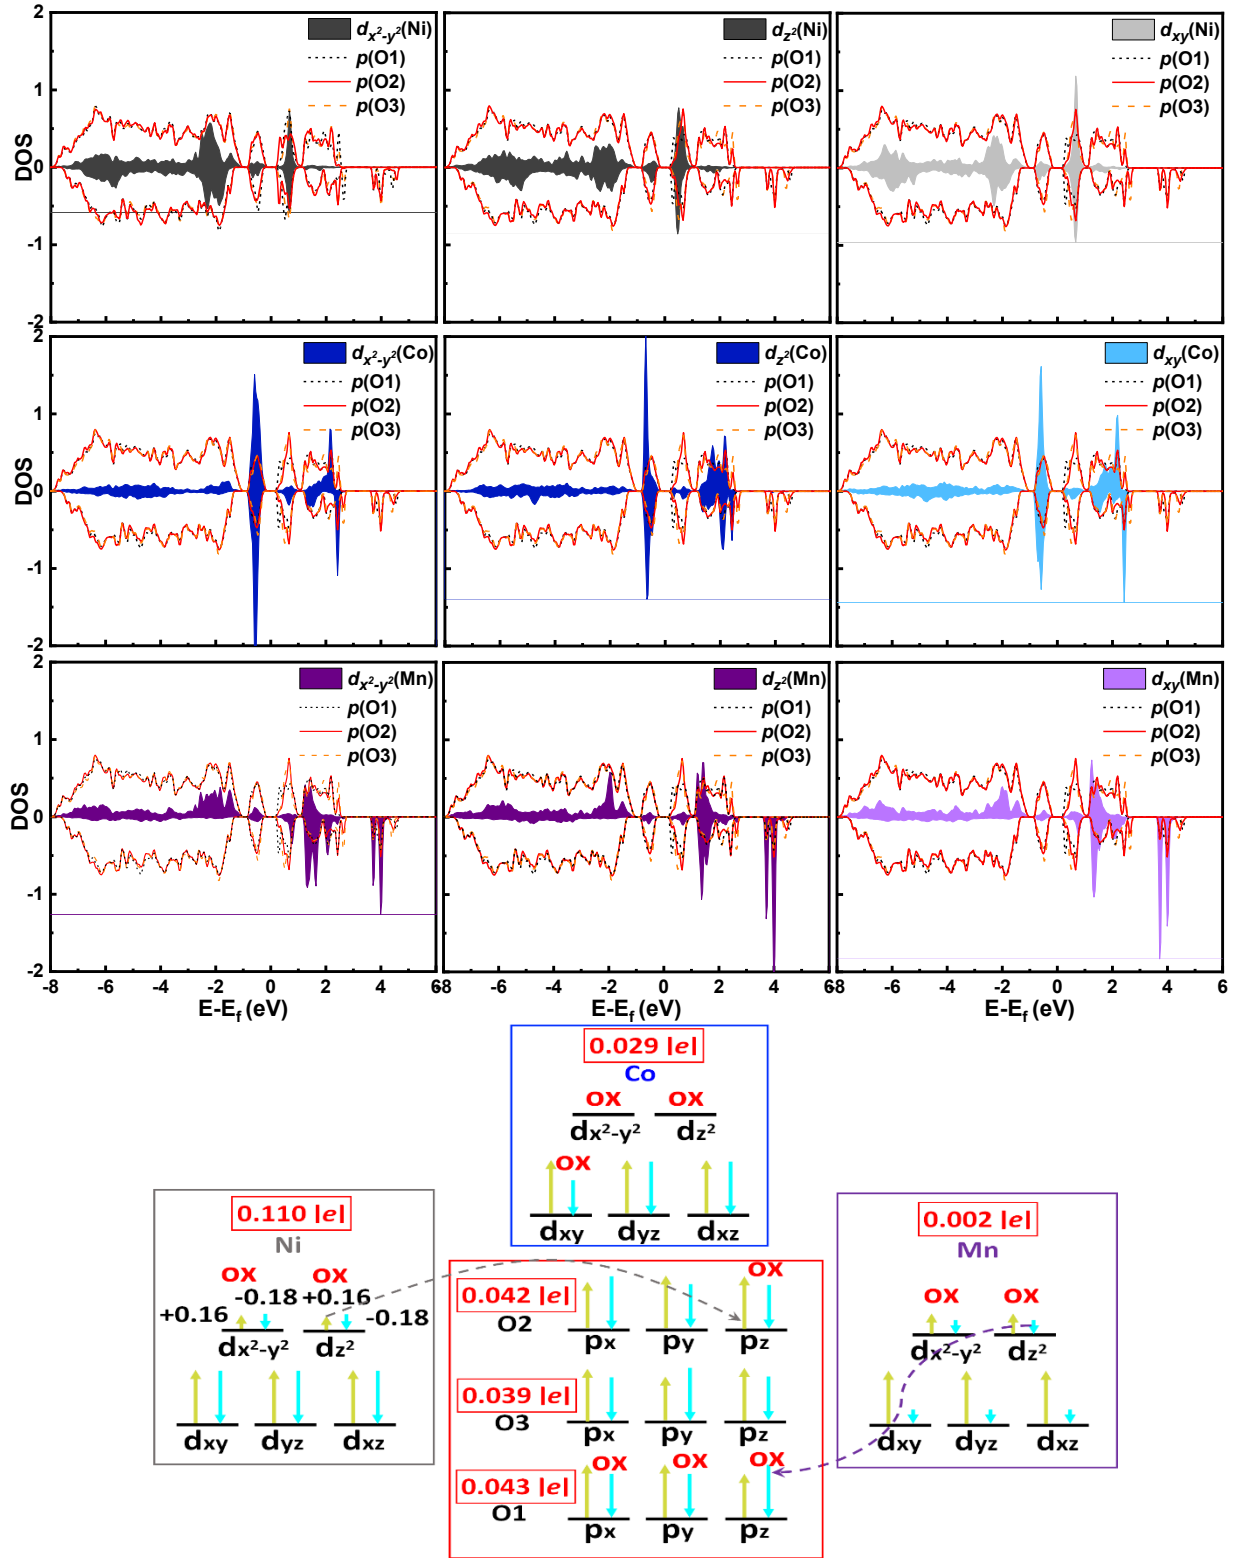

**Fig. S7.** Partial density of states (PDOSs) and proposed electronic configurations in the most favorable Li<sub>0.33</sub>NCM111 structures based on DFT-SCAN calculation. The atomic coordinates were rotated about the by-axis to align axial TM–O bonds (in TMO<sub>6</sub> octahedra) along the global z-axis of the unit cell to assign the  $e_g$  and representative  $t_{2g}$  states.



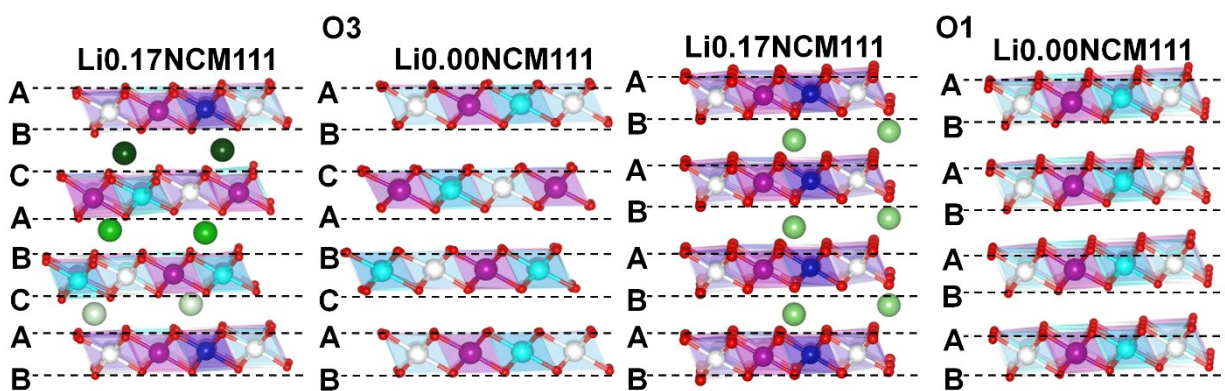

**Figure S8.** Calculated atomic structures and stacking of Li<sub>0.17</sub>NCM111 and Li<sub>0.00</sub>NCM111 structures in O3 and O1 phases using the SCAN functional.

|                         | Bader charge [ $e^-$ ] |       |       |       |        | $E_c$ [eV] |
|-------------------------|------------------------|-------|-------|-------|--------|------------|
|                         | Li                     | Ni    | Co    | Mn    | O      |            |
| O3                      | -                      | 1.406 | 1.504 | 1.755 | -0.778 | -777.73    |
| O1                      | -                      | 1.494 | 1.617 | 2.017 | -0.855 | -931.28    |
| formal charge [ $e^-$ ] |                        |       |       |       |        |            |
| O3                      | -                      | 4     | 4     | 4     | -2     | -5126.13   |
| O1                      | -                      | 4     | 4     | 4     | -2     | -5064.89   |

**Table S2.** Calculated Coulomb energies ( $E_c$ ) for O3 and O1 phases of Li<sub>0.00</sub>NCM111 using calculated averaged Bader charges (DFT-SCAN).
